# Supplementary material for: NAC Transcription Factor PwNAC11 Activates ERD1 by Interaction with ABF3 and DREB2A to Enhance Drought Tolerance in Transgenic Arabidopsis
Source: MDPI journal article supplement (doi:10.3390/ijms22136952), 2021-06-28
Supplement: s1 [file s1]

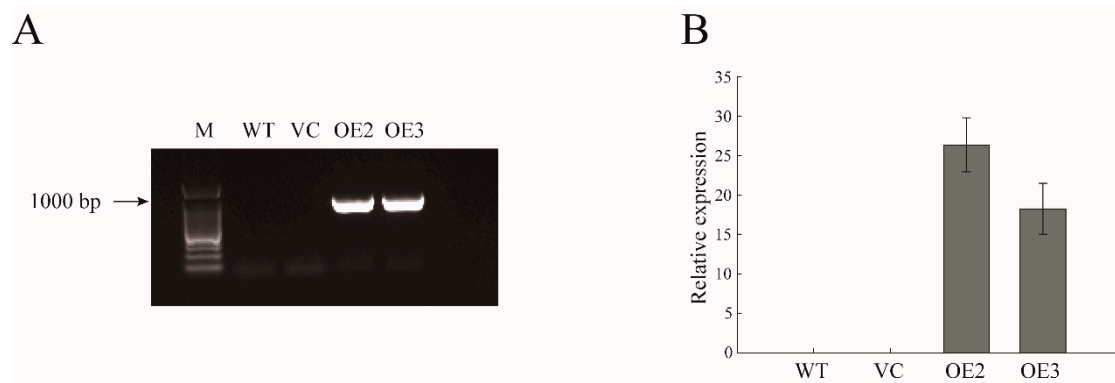

**Figure S1.** (A) The expression of PwNAC11 in transgenic *Arabidopsis* by RT-PCR. (B) The expression of PwNAC11 in transgenic *Arabidopsis* by RT-qPCR. Different letters indicate significant differences at  $p$ -value  $< 0.05$ .

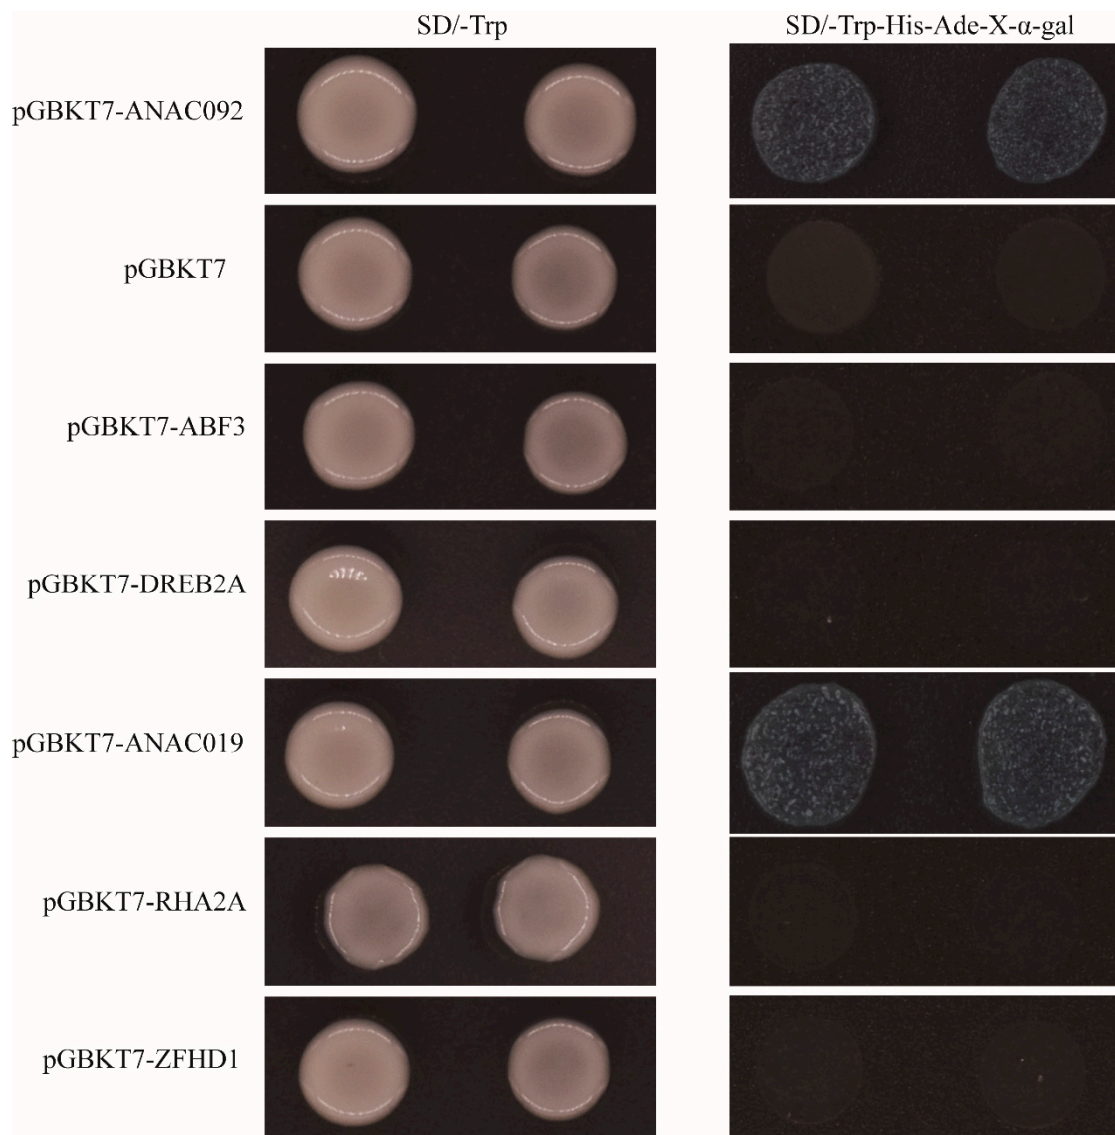

**Figure S2.** Yeast trans-acting activity assay for interacting proteins. pBD-ANAC092 was used as positive control.

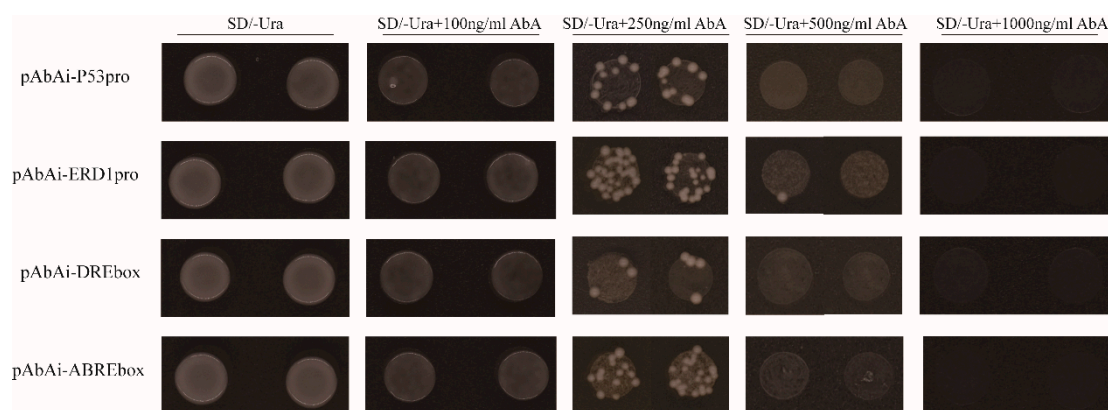

**Figure S3.** Screening of AbA concentration for yeast one-hybrid assays.

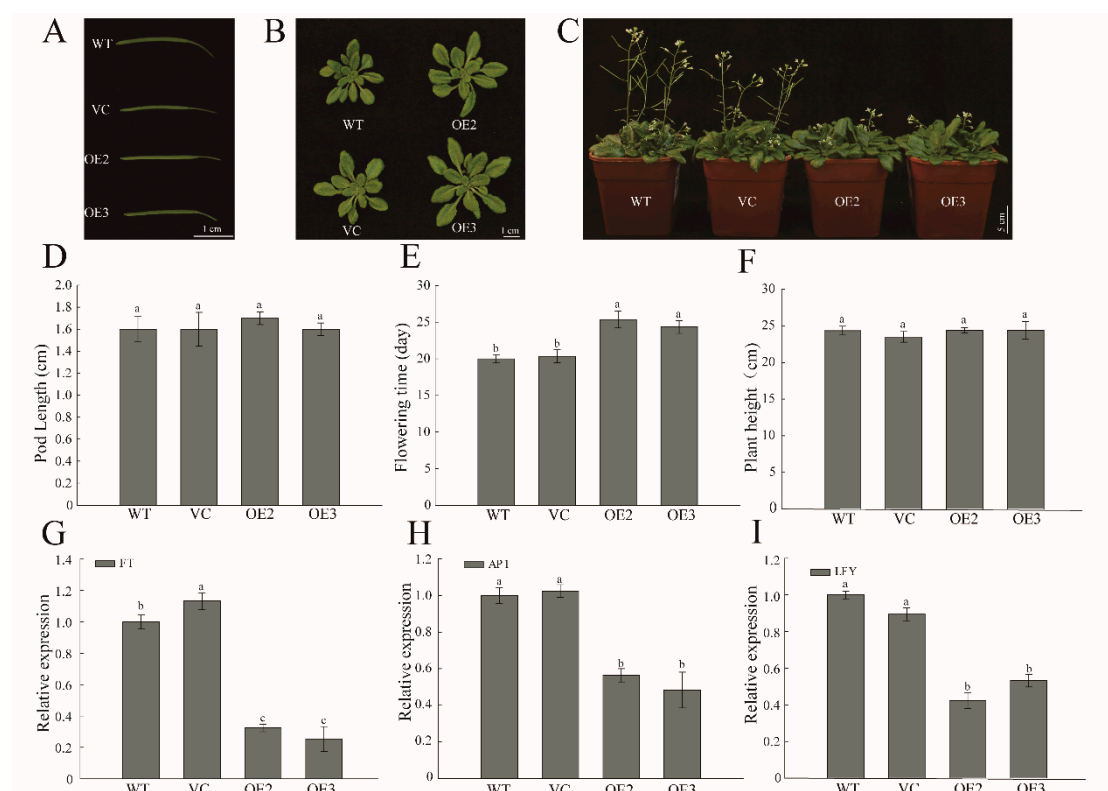

**Figure S4.** Effects of *PwNAC11* overexpression on plant growth and development. (A) Phenotypic assay of fruit pods in different lines under normal conditions. (B) Phenotypic assay of rosettes in each line under normal conditions. (D-F) Measurements of pod length, flowering time and plant height under normal conditions. (G-I) Expression patterns of some flowering-related genes. Different letters indicate significant differences at p-value < 0.05.

#### Supplementary Table S1. q-PCR primers used in this study

| Gene Name      | Gene No. | Sequences (5' to 3')   |  |
|----------------|----------|------------------------|--|
| <i>PwNAC11</i> | Forward  | AGCAGAAGAATAGCCAGACTGT |  |
|                | Reverse  | CAGGGCTCAGATTCATGGCA   |  |

|                                  |           |         |                         |
|----------------------------------|-----------|---------|-------------------------|
| <i>PwEF-1<math>\alpha</math></i> |           | Forward | AACTGGAGAAGGAACCCAAG    |
|                                  |           | Reverse | AACGACCCAATGGAGGATAC    |
| <i>ABF3</i>                      | AT4G34000 | Forward | GATGTGGTTAACCGTTCTCAAC  |
|                                  |           | Reverse | CAGCTTGCAGTAGATTGTTGTT  |
| <i>ATHB-7</i>                    | AT2G46680 | Forward | GCAAGTGGCTATATGGTTTCAG  |
|                                  |           | Reverse | GAAGCCAAGTTGTCGTAGTTTT  |
| <i>ZFHD1</i>                     | AT1G69600 | Forward | CTTCCGAGAATCTCAACTTCCT  |
|                                  |           | Reverse | TAAGAGCAAGGAACAGGAGAAG  |
| <i>NCED3</i>                     | AT3G14440 | Forward | GATGAATTTGTTCCAGAGAGCG  |
|                                  |           | Reverse | AACACTAGGATCAGCCGTTTTA  |
| <i>DREB2A</i>                    | AT5G05410 | Forward | CATGTTTGATGTCGATGAGCTT  |
|                                  |           | Reverse | ATTCCGTAGTTGAGGCTTTGTA  |
| <i>ANAC019</i>                   | AT1G52890 | Forward | AATTCAGCAACAACGGTACTTC  |
|                                  |           | Reverse | GGTTTTCTGTTTCGGTTAAGTCC |
| <i>ANAC055</i>                   | AT3G15500 | Forward | ACGAAGAGCTGATGGTTGAATA  |
|                                  |           | Reverse | TCCGTCGAGATAACTTTATCCG  |
| <i>ANAC032</i>                   | AT1G77450 | Forward | GATTGGACGATTGGGTATTGTG  |
|                                  |           | Reverse | AACGGAAAATCAAGGGCATTAC  |
| <i>ERD1</i>                      | AT5G51070 | Forward | CTTCTCTATCAGCACGAAACG   |
|                                  |           | Reverse | CGGTGCGATATATTGACAATCC  |
| <i>FT</i>                        | AT1G65480 | Forward | CTACAACTGGAACAACCTTTGG  |
|                                  |           | Reverse | TGACAATTGTAGAAAAGTGC GG |
| <i>API</i>                       | AT1G69120 | Forward | CATTCTCGAAAAGAAGAGCTGG  |
|                                  |           | Reverse | ACTCCATCGACCAGTTTGTATT  |
| <i>LYF</i>                       | AT5G11730 | Forward | TAAAATGCGACACTACGTTTAC  |
|                                  |           | Reverse | CAGCTTTGTTGGAACATACCAA  |
| <i>ABI5</i>                      | AT2G36270 | Forward | AATAAGAGAGGGATAGCGAACG  |
|                                  |           | Reverse | GCTACCACCACCTCTATGTATC  |
| <i>ACTIN</i>                     |           | Forward | GGTAACATTGTGCTCAGTGGTGG |
|                                  |           | Reverse | AACGACCTTAATCTTCATGCTGC |

---

**Supplementary Table S2. Primers for vectors' construction in this study**

| Gene Name                    |         | Sequences (5' to 3')              |
|------------------------------|---------|-----------------------------------|
| <i>ERD1pro</i> -KpnI-pAbAi-F | Forward | TTCGAGCTCGGTACCAATTTGAATAAAGAAGAG |
| <i>ERD1pro</i> -SalI-pAbAi-R | Reverse | TGCCTCGAGGTCGACAGGAAGTAGATAACACCT |
| <i>PwNAC11</i> -NdeI-AD-F    | Forward | GATTACGCTCATATGATGACACAGAAGGGT    |
| <i>PwNAC11</i> -EcoRI-AD-R   | Reverse | ACCCGGGTGGAATTCCTAATAAGACCTCTG    |
| <i>DREB2A</i> -AD-NdeI-F     | Forward | GATTACGCTCATATGATGGCAGTTTATGAT    |
| <i>DREB2A</i> -AD-EcoRI-R    | Reverse | ACCCGGGTGGAATTCCTAGTTCTCCAGATC    |
| <i>ABF3</i> -AD-NdeI-F       | Forward | GATTACGCTCATATGATGGGGTCTAGATTA    |
| <i>ABF3</i> -AD-EcoRI-R      | Reverse | ACCCGGGTGGAATTCCTACCAGGGACCCGT    |
| p0800- <i>ERD1</i> -KpnI-F   | Forward | GGCGAATTGGGTACCAATTTGAATAAAGAAGAG |
| p0800- <i>ERD1</i> -SalI-R   | Reverse | ATCGATACCGTCGACAGGAAGTAGATAACACCT |
| SK- <i>PwNAC11</i> -BamHI-F  | Forward | AGAACTAGTGGATCCATGACACAGAAGGGT    |
| SK- <i>PwNAC11</i> -SalI-R   | Reverse | CCCCTCGAGGTCGACCTAATAAGACCTCTG    |
| SK- <i>DREB2A</i> -BamHI-F   | Forward | AGAACTAGTGGATCCATGGCAGTTTATGAT    |
| SK- <i>DREB2A</i> -SalI-R    | Reverse | CCCCTCGAGGTCGACTTAGTTCTCCAGATC    |
| SK- <i>ABF3</i> -BamHI-F     | Forward | AGAACTAGTGGATCCATGGGGTCTAGATTA    |
| SK- <i>ABF3</i> -SalI-R      | Reverse | CCCCTCGAGGTCGACCTACCAGGGACCCGT    |
| <i>PwNAC11</i> -AD-NdeI-F    | Forward | GATTACGCTCATATGATGACACAGAAGGGT    |
| <i>PwNAC11</i> -AD-EcoRI-R   | Reverse | ACCCGGGTGGAATTCCTAATAAGACCTCTG    |
| <i>DREB2A</i> -BD-NdeI-F     | Forward | GAGGACCTGCATATGATGGCAGTTTATGATCAG |
| <i>DREB2A</i> -BD-SalI-R     | Reverse | CCGCTGCAGGTCGACTTAGTTCTCCAGATC    |
| <i>ABF3</i> -NdeI-BD-F       | Forward | GAGGACCTGCATATGATGGGGTCTAGATTAAAC |
| <i>ABF3</i> -SalI-BD-R       | Reverse | CCGCTGCAGGTCGACCTACCAGGGACCCGTC   |
| <i>RHA2A</i> -NdeI-BD-F      | Forward | GAGGACCTGCATATGATGGGGCTACAAGGT    |
| <i>RHA2A</i> -SalI-BD-R      | Reverse | CCGCTGCAGGTCGACTCAGTGGAGAGAGAA    |
| <i>ZFHD</i> -NdeI-BD-F       | Forward | TAAAATGCGACACTACGTTCAC            |
| <i>ZFHD</i> -SalI-BD-R       | Reverse | CAGCTTTGTTGGAACATAACCAA           |
| <i>ANAC019</i> -NdeI-BD-F    | Forward | GAGGACCTGCATATGATGGGTATCCAAGAA    |
| <i>ANAC019</i> -SalI-BD-R    | Reverse | CCGCTGCAGGTCGACTCACATAAACCCAAA    |
